# Supplementary material
Source: publisher site journal article supplement (https://www.spandidos-publications.com/3664/downloadSupplementary)

Figure S1. Overexpression efficiency of pcDNA3.1-KIF22 and pcDNA3.1-CDCA3 plasmid transfection in T24 cells. Western blot analysis revealed the expression of KIF22 and CDCA3 in T24 cells transfected as indicated. KIF22, kinesin family member 22; cell division cycle-associated protein 3.

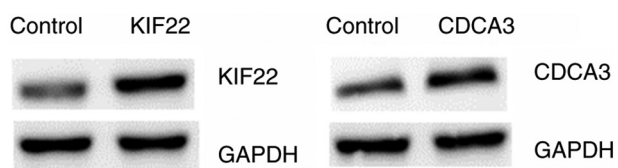

Supplement: Supplementary file 1 [file downloadSupplementary]
